# Supplementary material for: Intrahepatic Cholestasis of Pregnancy (ICP) in U.S. Latinas and Chileans: Clinical features, Ancestry Analysis, and Admixture Mapping
Source: PubMed Central journal article supplement (PMC4488338; doi:10.1371/journal.pone.0131211), 2015-06-30
Supplement: pone.0131211.s001.pdf [file pone.0131211.s001.pdf]

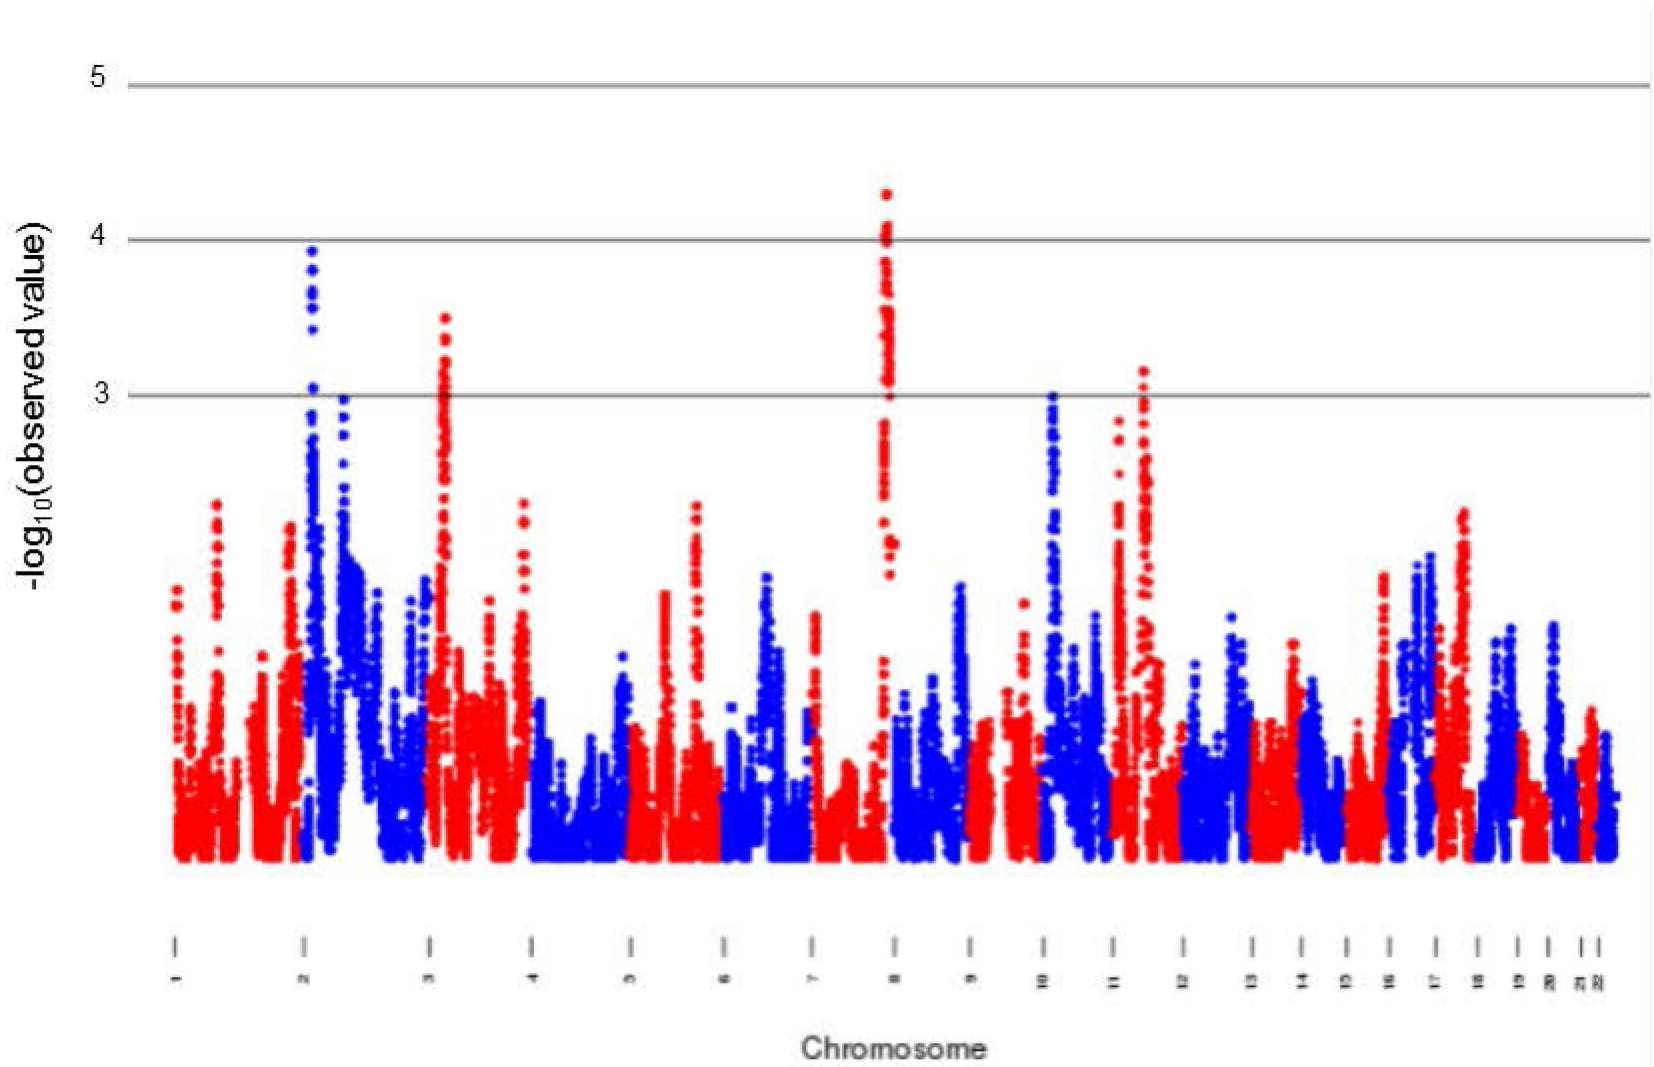

Supplementary Figure 1A.

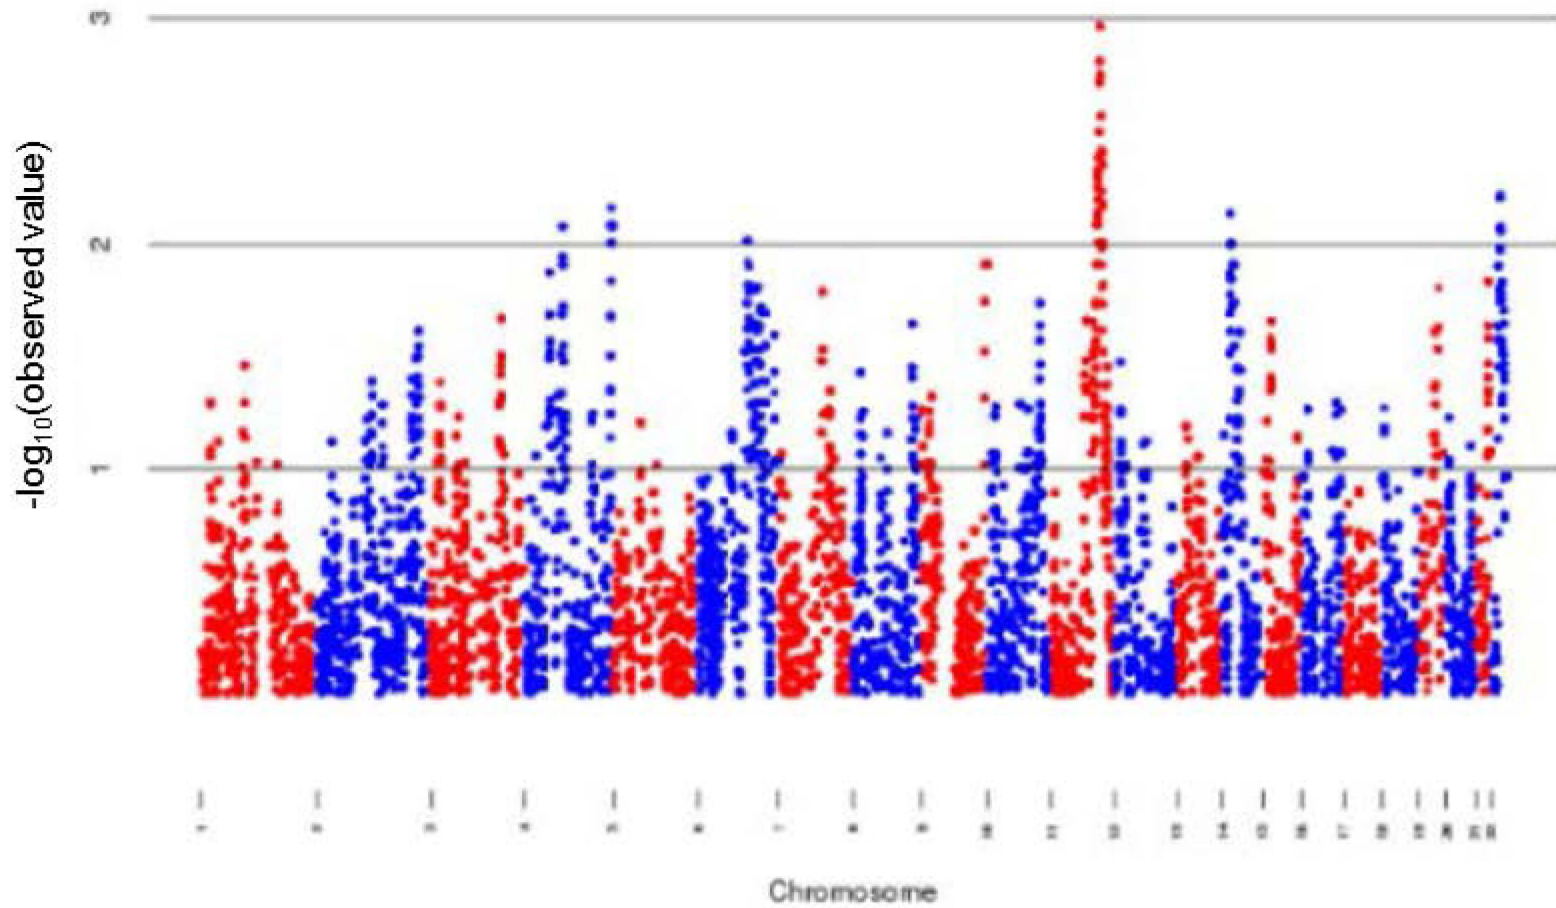

Supplementary Figure 1B.
